# Supplementary material for: Factors impacting new bone formation in transcrestal sinus floor elevation followed by implant placement: A cross-sectional study
Source: Research Square preprint supplement (doi:10.21203/rs.3.rs-1634319/v1), 2022-05-16
Supplement: Supplementary file 1 [file b75141d634415eda3233c4b2.xlsx]

## Sheet: Sheet5
survival during the healing period	IPL	perforatioon	bone grafting	implant shape	IPL
1	2.1	0	0	0	0
0	2.7	0	0	0	0
0	2.5	0	0	0	0
0	3.3	0	0	0	1
0	3.3	0	0	0	1
0	0.9	0	0	1	0
0	1.1	0	0	0	0
0	1.7	0	0	0	0
0	1.8	0	0	0	0
0	3.3	1	0	0	1
0	3.2	0	0	0	1
0	1.6	0	0	0	0
0	1	0	0	0	0
0	4.6	0	1	0	1
0	0.7	0	0	0	0
0	3.8	1	0	0	1
0	2.2	0	0	1	0
0	2	1	0	0	0
0	1.8	0	0	1	0
0	3.8	0	0	0	1
0	4	0	0	0	1
0	0.7	0	0	0	0
0	3	0	0	0	1
0	4	0	0	0	1
0	2.5	0	0	0	0
0	4.3	0	0	0	1
1	4.5	1	0	0	1
0	1.5	0	0	0	0
0	3	0	0	0	1
0	3.6	0	0	0	1
0	4.5	0	0	0	1
0	4.7	0	0	0	1
0	4.3	0	0	0	1
0	1.7	0	0	0	0
0	4.5	0	1	0	1
0	4	0	0	0	1
0	4.1	0	0	0	1
0	1	0	0	0	0
0	4.5	0	0	0	1
0	2.5	0	0	0	0
0	0.8	0	0	0	0
0	2.9	0	0	0	0
0	4.1	0	1	0	1
0	2.9	0	0	0	0
0	1.3	0	0	1	0
0	4	1	1	0	1
0	3.5	0	0	0	1
0	1.7	0	0	0	0
0	0.5	0	0	0	0
0	3.4	0	1	0	1
0	3.5	0	0	0	1
0	2.2	0	0	0	0
0	3.7	0	0	0	1
0	4.8	0	1	0	1
0	3	0	0	1	1
1	4.2	0	1	0	1
0	4.3	0	0	0	1
0	3.3	1	0	0	1
0	3.6	0	0	0	1
0	1.8	0	0	0	0
0	0.6	1	0	0	0
0	2.1	0	0	0	0
0	4.8	0	1	0	1
0	2.9	0	0	0	0
0	2.2	0	0	0	0
0	3.5	0	0	0	1
0	4.7	0	0	0	1
0	3.8	1	0	0	1
0	4.3	0	0	0	1
0	3.8	0	0	0	1
0	3.9	0	0	0	1
0	3.5	0	0	0	1
0	1.8	0	0	1	0
0	2.5	0	0	1	0
0	3.8	0	0	0	1
0	2.1	0	0	0	0
0	2.8	0	0	1	0
0	3.7	0	0	1	1
0	0.5	0	0	1	0
0	0.8	0	0	1	0
0	3.5	1	0	0	1
0	0.7	0	0	0	0
0	0.9	0	0	0	0
0	4.8	0	1	0	1
1	4.5	0	1	0	1
0	3.5	0	1	0	1
0	1.3	0	0	0	0
0	2.2	0	0	0	0
0	3.6	0	0	0	1
0	3.9	0	0	0	1
0	1.8	0	0	0	0
0	3.7	0	0	0	1
0	3.8	0	0	0	1
0	2.9	0	0	0	0
0	2.8	1	1	0	0
0	1.3	0	0	0	0
0	2.2	0	0	0	0
0	0.3	0	0	1	0
0	0.5	0	0	0	0
0	0.3	0	0	0	0
0	0.9	0	0	1	0
0	3.2	0	0	0	1
0	2.9	0	0	0	0
0	0.8	1	0	0	0
0	2.2	0	1	0	0
0	2.3	0	1	0	0
0	2.9	0	0	0	0
0	1.9	0	0	1	0
0	1.4	0	0	0	0
0	2.1	1	0	0	0
0	4.7	0	0	1	1
0	2.8	0	0	1	0
0	2.8	0	0	1	0
0	2.9	0	0	0	0
0	2.8	0	0	0	0
0	2.9	0	0	0	0
0	2.3	0	0	1	0
0	0.3	0	1	1	0
0	1.8	0	0	1	0
0	2.6	0	0	0	0
0	1.9	0	0	0	0
0	3.5	0	1	0	1
0	3.3	1	0	0	1
0	1.1	0	0	0	0
0	1.9	0	0	0	0
0	2.4	0	0	0	0
0	4.7	0	1	0	1
0	2.5	0	0	0	0
0	0.7	0	0	0	0
0	0.5	0	0	0	0
0	0.3	0	0	0	0
0	1.2	0	0	0	0
0	0.8	0	0	1	0
0	1.4	0	0	1	0
0	1.9	1	0	0	0
0	1.9	0	0	0	0
0	2.8	0	0	0	0
0	2.2	0	0	0	0
0	2.3	0	0	0	0
0	2.7	0	0	0	0
0	2.8	0	0	0	0
0	2.4	0	0	0	0
1	4.7	0	1	0	1
0	4.7	0	1	0	1
0	3.7	0	1	0	1
0	4.3	0	1	0	1
0	1.9	0	0	0	0
0	1.8	1	0	0	0
0	4.2	0	0	0	1
0	2.8	0	0	0	0
0	0.4	0	0	0	0
0	1.3	0	0	0	0
0	3.4	0	0	0	1
0	0.4	0	1	0	0
0	1.3	0	0	0	0
0	2.8	0	1	0	0
0	3.9	0	1	0	1
1	0.3	0	0	0	0
0	4.8	0	1	0	1
0	3.7	0	1	0	1
0	3.9	0	1	0	1
0	3.3	0	1	0	1
0	2.3	0	0	0	0
0	2	0	0	0	0
0	3.5	0	0	0	1
0	0.4	0	0	0	0
0	4.1	0	0	1	1
0	0.9	0	0	0	0
0	3.6	0	1	0	1
0	2.8	1	0	0	0
0	3.8	0	0	0	1
0	1.7	0	0	0	0
0	3.9	0	1	0	1
0	3.4	1	0	0	1
0	3.7	0	0	0	1
0	0.8	0	0	0	0
0	1.9	0	1	1	0
0	2.7	0	0	0	0
0	1.6	0	0	0	0
0	2.5	0	0	0	0
0	2.8	0	0	0	0
0	2.8	0	0	0	0
0	3.9	0	0	0	1
0	2.7	0	1	0	0
0	2.4	0	0	0	0
0	1.8	0	0	0	0
0	2.9	0	0	0	0
0	2.8	0	0	0	0
0	0.6	0	0	0	0
0	2.1	0	0	0	0
0	2.3	0	0	0	0
0	2.2	1	0	0	0
0	1.3	0	0	0	0
0	2.6	0	1	0	0
0	3.2	0	0	0	1
0	3.7	0	0	0	1
0	2.9	0	0	0	0
0	3.2	0	0	0	1
0	2.5	0	0	0	0
0	1.1	0	0	0	0
0	1.5	1	0	0	0
0	3.2	0	0	0	1
0	2.9	0	0	0	0
0	2.4	1	0	0	0
0	2.6	1	0	0	0
0	1.5	0	0	0	0
0	2.1	0	0	0	0
0	1.9	0	1	0	0
0	1.4	0	1	0	0
0	2.6	0	1	0	0
0	1.2	0	0	0	0
0	3.9	0	0	0	1
0	1.5	0	0	0	0
0	1.8	0	0	0	0
0	3.6	0	0	0	1
0	2.1	0	0	0	0
0	2.1	0	0	0	0
0	1.7	0	0	0	0
1	3.3	1	0	0	1
1	4.2	0	0	0	1
0	2.7	0	0	0	0
0	3.6	0	0	0	1
0	2.9	0	0	0	0
0	2	0	1	0	0
0	4.1	0	0	0	1
0	1.8	0	0	0	0
0	0.3	0	0	0	0
0	1.2	0	0	0	0
0	2.6	0	0	0	0
0	3.2	0	0	0	1
0	3.3	0	1	0	1
0	2.4	0	0	0	0
0	1.9	0	0	0	0
0	2.2	0	0	0	0
0	2.5	1	0	0	0
0	1.2	0	0	0	0
0	1.6	0	1	0	0
0	1.5	1	1	0	0
0	0.6	0	0	0	0
0	3.4	0	0	0	1
0	1.6	0	0	0	0
0	3.5	0	1	0	1
0	4.8	0	0	0	1
0	3.2	0	0	0	1
0	1.9	0	0	0	0
0	2.3	0	0	0	0
0	2.1	1	0	0	0
0	4.5	0	0	0	1
0	2.9	0	0	0	0
0	1.9	0	0	0	0
0	0.8	0	0	0	0
0	2.2	0	0	0	0
0	1	0	0	0	0
0	4.2	0	0	0	1
0	2.7	0	0	0	0
0	2.8	0	0	0	0
0	0.3	0	0	0	0
0	2.2	0	0	0	0
0	2	1	0	0	0
0	1.5	0	0	1	0
0	1.6	0	0	0	0
0	0.9	0	0	0	0
0	3.4	0	0	0	1
0	3.5	0	0	1	1
0	0.3	0	0	1	0
0	4.8	0	0	0	1
0	4.8	0	1	0	1
0	0.3	0	0	0	0
0	2.2	0	0	0	0
0	3.2	1	0	0	1
0	2.5	0	0	0	0
0	1.8	0	0	0	0
0	2.6	0	0	0	0
0	1.5	0	0	0	0
0	1.6	0	0	0	0
0	1.9	0	0	0	0
0	3.6	0	0	0	1
0	4.1	0	0	0	1
0	1.8	0	0	0	0
0	3.7	0	0	1	1
0	2.6	0	0	1	0
0	4.9	0	0	1	1
0	3.2	0	0	1	1
0	3.6	0	0	0	1
0	0.3	0	0	0	0
0	2	0	0	0	0
0	4.6	0	0	1	1
0	4.9	0	0	1	1
0	0.6	0	1	0	0
0	2.5	0	1	0	0
0	3.2	0	0	0	1
0	1.9	1	0	0	0
0	3.9	0	0	0	1
0	4.3	0	0	0	1
0	3.5	1	0	0	1
0	3.6	1	0	0	1
0	2.4	0	0	0	0
0	2.5	0	0	0	0
0	3.4	0	0	0	1
0	4.9	0	0	0	1
0	1.6	0	0	1	0
0	2.5	0	0	0	0
0	2.6	1	0	0	0
0	2.6	0	0	0	0
0	1.6	0	0	0	0
0	3.5	0	0	0	1
0	0.9	0	0	1	0
0	4.8	0	0	1	1
0	4.9	0	0	1	1
0	1.1	0	0	0	0
0	4.6	0	0	1	1
0	3.5	0	0	0	1
0	3.6	0	0	0	1
0	1.2	0	0	1	0
1	3.1	0	0	1	1
0	2.9	0	0	1	0
0	2.7	0	0	1	0
0	4.7	0	0	1	1
0	2.1	0	0	0	0
0	3.5	0	0	1	1
0	2.3	0	1	1	0
0	4.3	0	0	1	1
0	1.3	0	1	1	0
0	2.7	1	0	1	0
0	0.5	0	0	1	0
0	4.9	1	0	1	1
0	4.9	0	1	0	1
0	3.5	0	0	1	1
0	2.3	1	0	0	0
0	0.4	0	0	1	0
0	3.9	0	0	0	1
1	4.8	0	0	1	1
0	2.6	0	0	0	0
0	4.6	0	0	0	1
0	0.5	0	0	0	0
0	2.2	0	0	0	0
0	2.5	0	0	0	0
0	3.9	1	1	0	1
0	4.6	0	0	0	1
0	1.2	0	0	0	0
0	1.2	0	0	1	0
0	4.3	0	0	0	1
0	3.5	0	0	0	1
0	2.8	0	0	0	0
0	1.3	0	1	1	0
0	2.3	0	0	1	0
0	2.6	0	0	1	0
0	4.6	1	0	1	1
0	4.6	0	0	1	1
0	4.9	0	0	1	1
0	4.8	0	1	1	1
0	3.3	0	0	1	1
0	3.6	0	0	1	1
0	1.7	0	0	1	0
0	3.2	0	0	1	1
0	2.9	0	0	1	0
0	2.4	0	0	1	0

## Sheet: Sheet1
NBF	perforation	grafting	IPL	number	implant type
1.5	0	0	2.7	0	0
1.95	0	0	2.5	0	0
0.925	0	0	3.3	1	0
0.925	0	0	3.3	1	0
0.7	0	0	0.9	0	1
0.975	1	0	3.3	1	0
1	0	0	3.2	1	0
1.3	0	0	1.6	1	0
1.325	0	0	1	1	0
2.175	1	0	3.8	0	0
0.65	1	0	2	0	0
0.85	0	0	1.8	0	1
1.05	0	0	3.8	0	0
0.925	0	0	0.7	0	0
0.85	0	0	3	0	0
0.95	0	0	4	0	0
1.575	0	0	2.5	0	0
3.525	0	0	4.3	0	0
0.825	1	0	4.5	0	0
1.075	0	0	4.5	0	0
3.725	0	0	4.7	1	0
3.55	0	0	4.3	1	0
5.575	0	1	4.5	0	0
1.225	0	0	4	1	0
1.425	0	0	4.1	1	0
1.925	0	0	1	0	0
1.55	0	0	2.5	0	0
0.875	0	0	2.9	0	0
2.575	0	0	2.9	0	0
1.975	1	1	4	0	0
1.45	0	0	1.7	0	0
1.375	0	0	0.5	0	0
1.375	0	1	3.4	0	0
2.075	0	0	3.5	0	0
1.325	0	0	2.2	1	0
1.325	0	0	3.7	1	0
4.2	0	1	4.8	0	0
0.95	1	0	3.3	0	0
1.05	0	0	1.8	0	0
2.7	0	0	2.9	0	0
2.925	0	0	2.2	0	0
3.225	0	0	3.5	1	0
3	0	0	4.7	1	0
2.725	1	0	3.8	0	0
2.825	0	0	4.3	1	0
2.875	0	0	3.8	1	0
1.375	0	0	3.7	0	1
2.225	0	1	4.5	1	0
2.35	0	1	3.5	1	0
0.925	1	0	2	0	0
0.975	0	0	1.5	0	1
0.95	0	0	1.6	0	0
2.375	0	0	3.5	0	1
0.875	0	0	4.8	0	0
0.95	0	0	1.8	0	0
1.075	0	0	3.7	1	1
1.2	0	0	2.6	1	1
1	0	0	4.9	1	1
2.4	0	0	3.2	0	1
1.05	0	0	3.6	0	0
1.65	0	0	0.3	0	0
1.25	0	0	4.6	1	1
1.1	0	0	4.9	1	1
0.975	0	0	3.2	0	0
1.1	1	0	1.9	0	0
0.925	0	0	3.9	0	0
0.925	0	0	4.3	0	0
1.025	0	0	3.4	0	0
0.675	0	0	4.9	0	0
0.725	0	0	1.6	0	1
0.85	0	0	2.5	0	0
1.075	1	0	2.6	0	0
1.075	0	0	1.6	0	0
0.875	0	0	0.9	1	1
0.925	0	0	4.8	1	1
1.2	0	0	4.9	0	1
0.95	0	0	1.1	0	0
1.1	0	0	4.6	0	1
2.075	0	0	1.2	0	1
3.1	0	0	3.1	1	1
3.1	0	0	2.9	1	1
1.475	0	1	2.3	1	1
2.475	0	0	4.3	1	1
2.5	0	1	1.3	0	1
0.575	1	0	4.9	0	1
2.6	0	1	4.9	0	0
1	0	0	3.5	0	1
0.7	1	0	2.3	0	0
0.625	0	0	3.9	0	0
0.525	0	0	4.8	0	1
1.1	0	0	0.5	1	0
1.175	0	0	2.2	1	0
1.2	0	0	2.5	0	0
3.55	1	1	3.9	0	0
2.525	0	0	4.6	0	0
2.025	0	0	1.2	0	1
1.2	0	1	1.3	0	1
0.95	0	0	2.6	0	1
0.6	1	0	4.6	0	1
1.075	0	0	4.6	1	1
0.85	0	0	4.9	1	1
4.225	0	1	4.8	0	1
1.15	0	0	3.3	1	1
1.125	0	0	3.6	1	1
1.025	0	0	1.7	0	1
1.025	0	0	3.2	0	1
1.025	0	0	2.9	0	1

## Sheet: Sheet3
perforation	bone grafting	diabetes	smoking	implant shape	healing method	MBL
2	1	2	1	2	1	0.61
2	1	2	1	2	2	0.72
2	1	1	1	2	2	0.35
2	1	2	1	2	2	0.46
2	1	2	1	2	2	0.69
2	1	2	1	2	2	0.64
1	1	2	1	2	2	0.37
2	1	2	1	2	2	0.24
2	1	2	1	2	2	0.26
2	1	2	1	2	2	0.33
2	1	2	1	2	2	0.31
2	1	2	1	2	2	0.33
2	1	2	2	2	2	0.37
2	1	2	1	2	2	0.26
1	1	2	1	2	2	0.3
2	1	2	1	2	2	0.29
2	1	2	1	2	2	0.39
2	1	2	1	2	2	0.35
2	2	2	1	2	1	0.36
2	1	2	1	2	1	0.41
2	1	2	1	2	1	0.43
2	1	2	1	2	2	0.78
2	1	1	2	2	2	0.32
2	1	2	2	2	2	0.22
2	1	2	1	2	2	0.28
2	1	2	1	2	2	0.31
2	2	2	1	2	2	0.73
2	1	1	1	2	2	0.61
2	1	1	1	2	1	0.63
2	2	1	1	2	1	0.26
2	1	2	1	2	2	0.55
2	1	2	1	2	2	0.29
2	1	2	1	2	2	0.35
2	1	2	1	1	2	0.81
1	1	1	1	2	2	0.65
2	1	2	1	2	2	0.79
1	1	2	1	2	1	0.57
2	1	2	1	2	2	0.59
2	2	2	1	2	2	0.68
2	1	2	1	2	2	0.43
2	1	2	2	2	2	0.47
2	1	2	2	2	1	0.49
2	1	2	2	2	1	0.46
1	1	2	1	2	1	0.48
2	1	2	1	2	1	0.5
1	1	2	1	2	2	0.44
2	1	2	1	2	2	0.57
2	1	2	1	2	2	0.86
2	2	2	1	2	2	0.32
2	1	2	1	2	2	0.43
2	1	2	1	2	2	0.57
2	1	2	1	2	2	0.36
2	1	2	1	2	2	0.71
2	1	2	1	2	2	0.39
2	1	2	1	2	2	0.37
2	1	2	1	2	1	0.25
2	1	2	1	2	2	0.24
2	1	2	1	2	2	0.38
2	1	2	1	2	2	0.28
1	1	2	1	2	1	0.43
2	2	2	2	2	2	0.45
2	2	2	2	2	2	0.41
2	1	2	1	2	2	0.65
2	1	2	1	2	2	0.69
1	1	2	1	2	2	0.54
2	1	2	1	1	2	0.7
2	1	2	1	1	2	0.58
2	1	2	1	2	2	0.52
2	1	2	2	2	2	0.66
2	1	2	2	2	2	0.62
2	1	2	1	2	2	0.58
2	1	2	1	2	2	0.24
2	1	2	1	2	2	0.29
2	1	2	1	2	2	0.38
2	2	2	1	2	2	0.49
2	1	2	1	2	2	0.37
2	1	2	1	2	2	0.4
2	1	2	1	2	1	0.48
2	1	2	1	2	1	0.42
2	1	1	1	1	2	0.66
2	1	1	1	1	2	0.53
1	1	1	1	2	2	0.37
2	1	2	1	2	1	0.58
2	1	2	1	2	2	0.53
2	1	2	1	2	1	0.49
2	1	1	1	2	1	0.68
2	1	2	1	2	2	0.79
2	1	2	1	2	2	0.76
2	1	2	1	2	2	0.57
1	1	2	1	2	2	0.69
2	1	2	2	2	1	0.64
2	1	2	1	2	1	0.49
2	1	2	1	2	1	0.49
2	2	2	2	2	2	0.62
2	1	2	1	2	2	0.52
2	2	2	1	2	1	0.68
2	2	2	1	2	1	0.62
2	2	2	2	2	1	0.64
2	2	2	2	2	2	0.68
2	2	2	1	2	2	0.65
2	2	2	1	2	1	0.58
2	1	2	1	2	2	0.73
2	1	2	1	2	2	0.62
2	1	2	1	2	2	0.71
2	1	2	1	2	1	0.3
2	2	2	1	2	1	0.57
2	1	2	1	2	2	0.69
2	2	2	1	2	1	0.47
2	1	2	1	2	2	0.69
2	2	2	1	1	2	0.46
2	1	2	1	2	1	0.82
2	1	2	1	2	1	0.68
2	1	2	1	2	2	0.61
2	1	2	2	2	2	0.49
2	1	2	1	2	2	0.54
2	2	2	2	2	2	0.71
2	1	2	1	2	2	0.64
2	1	2	1	2	2	0.7
2	1	2	1	2	2	0.81
1	1	2	1	2	2	0.85
2	1	2	1	2	2	0.71
2	1	2	1	2	2	0.79
2	1	2	1	2	2	0.55
2	1	2	1	2	2	0.66
2	1	2	1	2	2	0.7
2	1	2	1	2	2	0.73
2	2	2	1	2	2	0.61
2	2	2	1	2	2	0.62
2	1	2	1	2	2	0.47
2	1	2	1	2	1	0.44
2	1	2	1	2	2	0.59
2	1	2	1	2	2	0.38
2	1	2	1	2	2	0.79
2	1	2	1	2	2	0.81
2	2	2	1	2	2	0.39
2	1	2	1	2	2	0.82
2	1	2	2	2	2	0.78
2	1	2	2	2	2	0.72
2	1	1	2	2	2	0.51
2	1	1	2	2	2	0.39
1	1	2	1	2	1	0.31
2	1	2	1	2	2	0.25
2	1	2	1	2	2	0.29
2	1	2	1	2	2	0.36
2	2	2	1	2	2	0.29
2	1	2	1	2	2	0.29
2	1	2	1	1	2	0.31
2	1	2	1	2	1	0.27
2	1	2	1	2	2	0.58
2	1	2	1	2	2	0.33
2	1	2	1	1	1	0.32
2	1	2	1	1	1	0.35
2	2	2	1	2	2	0.3
2	2	2	1	2	2	0.32
2	1	2	1	2	2	0.33
1	1	2	1	2	2	0.35
2	1	2	1	2	2	0.32
2	1	2	1	2	2	0.33
1	1	2	1	2	2	0.35
1	1	2	1	2	2	0.29
2	1	2	1	2	2	0.25
2	1	2	1	2	2	0.27
2	1	2	1	2	1	0.79
2	1	2	1	2	1	0.59
2	1	2	1	1	2	0.29
2	1	1	1	2	2	0.37
1	1	2	1	2	2	0.36
2	1	2	2	2	2	0.32
2	1	1	1	2	2	0.41
2	1	2	1	2	2	0.36
2	1	2	1	1	2	0.35
2	1	2	1	1	2	0.65
2	1	2	1	1	2	0.49
2	1	2	2	2	2	0.5
2	1	2	2	1	2	0.31
2	1	2	1	2	2	0.32
2	1	2	1	2	2	0.35
2	1	2	1	1	2	0.29
2	1	2	1	1	2	0.53
2	1	2	1	1	2	0.51
2	1	2	1	2	2	0.3
2	1	2	1	1	2	0.41
2	2	2	1	1	2	0.61
2	1	2	1	1	2	0.25
2	2	2	2	1	2	0.41
1	1	2	1	1	2	0.35
2	1	2	1	1	2	0.26
1	1	2	2	1	2	0.32
2	2	2	1	2	2	0.24
2	1	2	1	1	2	0.59
1	1	1	1	2	1	0.32
2	1	2	1	2	2	0.29
2	1	2	1	2	2	0.44

## Sheet: Sheet4
following	survive	perforation	grafting	IPL	implant type		following	survive	perforation	grafting	IPL	implant type
2	1	否	否	2.1	ITI		2	1	0	0	2.1	0
31	0	否	否	2.7	ITI		31	0	0	0	2.7	0
31	0	否	否	2.5	ITI		31	0	0	0	2.5	0
31	0	否	否	3.3	ITI		31	0	0	0	3.3	0
31	0	否	否	3.3	ITI		31	0	0	0	3.3	0
31	0	否	否	0.9	NOBEL		31	0	0	0	0.9	1
30	0	否	否	1.1	ITI		30	0	0	0	1.1	0
30	0	否	否	1.7	ITI		30	0	0	0	1.7	0
30	0	否	否	1.8	ITI		30	0	0	0	1.8	0
30	0	是	否	3.3	ITI		30	0	1	0	3.3	0
30	0	否	否	3.2	ITI		30	0	0	0	3.2	0
24	0	否	否	1.6	ITI		24	0	0	0	1.6	0
24	0	否	否	1	ITI		24	0	0	0	1	0
6	1	否	是	4.6	ITI		6	1	0	1	4.6	0
24	0	否	否	0.7	ITI		24	0	0	0	0.7	0
24	0	是	否	3.8	ITI		24	0	1	0	3.8	0
23	0	否	否	2.2	NOBEL		23	0	0	0	2.2	1
23	0	是	否	2	ITI		23	0	1	0	2	0
23	0	否	否	1.8	NOBEL		23	0	0	0	1.8	1
22	0	否	否	3.8	ITI		22	0	0	0	3.8	0
22	0	否	否	4	ITI		22	0	0	0	4	0
22	0	否	否	0.7	ITI		22	0	0	0	0.7	0
22	0	否	否	3	ITI		22	0	0	0	3	0
22	0	否	否	4	ITI		22	0	0	0	4	0
22	0	否	否	2.5	ITI		22	0	0	0	2.5	0
22	0	否	否	4.3	ITI		22	0	0	0	4.3	0
1	1	是	否	4.5	ITI		1	1	1	0	4.5	0
36	0	否	否	1.5	ITI		36	0	0	0	1.5	0
36	0	否	否	3	ITI		36	0	0	0	3	0
35	0	否	否	3.6	ITI		35	0	0	0	3.6	0
35	0	否	否	4.5	ITI		35	0	0	0	4.5	0
35	0	否	否	4.7	ITI		35	0	0	0	4.7	0
35	0	否	否	4.3	ITI		35	0	0	0	4.3	0
35	0	否	否	1.7	ITI		35	0	0	0	1.7	0
35	0	否	是	4.5	ITI		35	0	0	1	4.5	0
35	0	否	否	4	ITI		35	0	0	0	4	0
35	0	否	否	4.1	ITI		35	0	0	0	4.1	0
35	0	否	否	1	ITI		35	0	0	0	1	0
35	0	否	否	4.5	ITI		35	0	0	0	4.5	0
35	0	否	否	2.5	ITI		35	0	0	0	2.5	0
34	0	否	否	0.8	ITI		34	0	0	0	0.8	0
34	0	否	否	2.9	ITI		34	0	0	0	2.9	0
34	0	否	是	4.1	ITI		34	0	0	1	4.1	0
34	0	否	否	2.9	ITI		34	0	0	0	2.9	0
34	0	否	否	1.3	NOBEL		34	0	0	0	1.3	1
33	0	是	是	4	ITI		33	0	1	1	4	0
33	0	否	否	3.5	ITI		33	0	0	0	3.5	0
33	0	否	否	1.7	ITI		33	0	0	0	1.7	0
52	0	否	否	0.5	ITI		52	0	0	0	0.5	0
31	0	否	是	3.4	ITI		31	0	0	1	3.4	0
31	0	否	否	3.5	ITI		31	0	0	0	3.5	0
31	0	否	否	2.2	ITI		31	0	0	0	2.2	0
31	0	否	否	3.7	ITI		31	0	0	0	3.7	0
42	0	否	是	4.8	ITI		42	0	0	1	4.8	0
42	0	否	否	3	NOBEL		42	0	0	0	3	1
3	1	否	是	4.2	ITI		3	1	0	1	4.2	0
46	0	否	否	4.3	ITI		46	0	0	0	4.3	0
41	0	是	否	3.3	ITI		41	0	1	0	3.3	0
41	0	否	否	3.6	ITI		41	0	0	0	3.6	0
41	0	否	否	1.8	ITI		41	0	0	0	1.8	0
40	0	是	否	0.6	ITI		40	0	1	0	0.6	0
40	0	否	否	2.1	ITI		40	0	0	0	2.1	0
40	0	否	是	4.8	ITI		40	0	0	1	4.8	0
40	0	否	否	2.9	ITI		40	0	0	0	2.9	0
40	0	否	否	2.2	ITI		40	0	0	0	2.2	0
38	0	否	否	3.5	ITI		38	0	0	0	3.5	0
38	0	否	否	4.7	ITI		38	0	0	0	4.7	0
38	0	是	否	3.8	ITI		38	0	1	0	3.8	0
38	0	否	否	4.3	ITI		38	0	0	0	4.3	0
38	0	否	否	3.8	ITI		38	0	0	0	3.8	0
38	0	否	否	3.9	ITI		38	0	0	0	3.9	0
38	0	否	否	3.5	ITI		38	0	0	0	3.5	0
46	0	否	否	1.8	NOBEL		46	0	0	0	1.8	1
46	0	否	否	2.5	NOBEL		46	0	0	0	2.5	1
12	1	否	否	3.8	ITI		12	1	0	0	3.8	0
46	0	否	否	2.1	ITI		46	0	0	0	2.1	0
45	0	否	否	2.8	NOBEL		45	0	0	0	2.8	1
45	0	否	否	3.7	NOBEL		45	0	0	0	3.7	1
45	0	否	否	0.5	NOBEL		45	0	0	0	0.5	1
45	0	否	否	0.8	NOBEL		45	0	0	0	0.8	1
45	0	是	否	3.5	ITI		45	0	1	0	3.5	0
45	0	否	否	0.7	ITI		45	0	0	0	0.7	0
45	0	否	否	0.9	ITI		45	0	0	0	0.9	0
45	0	否	是	4.8	ITI		45	0	0	1	4.8	0
2	1	否	是	4.5	ITI		2	1	0	1	4.5	0
44	0	否	是	3.5	ITI		44	0	0	1	3.5	0
44	0	否	否	1.3	ITI		44	0	0	0	1.3	0
44	0	否	否	2.2	ITI		44	0	0	0	2.2	0
44	0	否	否	3.6	ITI		44	0	0	0	3.6	0
43	0	否	否	3.9	ITI		43	0	0	0	3.9	0
43	0	否	否	1.8	ITI		43	0	0	0	1.8	0
52	0	否	否	3.7	ITI		52	0	0	0	3.7	0
52	0	否	否	3.8	ITI		52	0	0	0	3.8	0
52	0	否	否	2.9	ITI		52	0	0	0	2.9	0
52	0	是	是	2.8	ITI		52	0	1	1	2.8	0
52	0	否	否	1.3	ITI		52	0	0	0	1.3	0
52	0	否	否	2.2	ITI		52	0	0	0	2.2	0
52	0	否	否	0.3	NOBEL		52	0	0	0	0.3	1
51	0	否	否	0.5	ITI		51	0	0	0	0.5	0
51	0	否	否	0.3	ITI		51	0	0	0	0.3	0
51	0	否	否	0.9	NOBEL		51	0	0	0	0.9	1
51	0	否	否	3.2	ITI		51	0	0	0	3.2	0
51	0	否	否	2.9	ITI		51	0	0	0	2.9	0
51	0	是	否	0.8	ITI		51	0	1	0	0.8	0
50	0	否	是	2.2	ITI		50	0	0	1	2.2	0
50	0	否	是	2.3	ITI		50	0	0	1	2.3	0
50	0	否	否	2.9	ITI		50	0	0	0	2.9	0
50	0	否	否	1.9	NOBEL		50	0	0	0	1.9	1
50	0	否	否	1.4	ITI		50	0	0	0	1.4	0
50	0	是	否	2.1	ITI		50	0	1	0	2.1	0
50	0	否	否	4.7	NOBEL		50	0	0	0	4.7	1
50	0	否	否	2.8	NOBEL		50	0	0	0	2.8	1
50	0	否	否	2.8	NOBEL		50	0	0	0	2.8	1
60	0	否	否	2.9	ITI		60	0	0	0	2.9	0
49	0	否	否	2.8	ITI		49	0	0	0	2.8	0
49	0	否	否	2.9	ITI		49	0	0	0	2.9	0
49	0	否	否	2.3	NOBEL		49	0	0	0	2.3	1
49	0	否	是	0.3	NOBEL		49	0	0	1	0.3	1
59	0	否	否	1.8	NOBEL		59	0	0	0	1.8	1
58	0	否	否	2.6	ITI		58	0	0	0	2.6	0
58	0	否	否	1.9	ITI		58	0	0	0	1.9	0
58	0	否	是	3.5	ITI		58	0	0	1	3.5	0
58	0	是	否	3.3	ITI		58	0	1	0	3.3	0
58	0	否	否	1.1	ITI		58	0	0	0	1.1	0
58	0	否	否	1.9	ITI		58	0	0	0	1.9	0
58	0	否	否	2.4	ITI		58	0	0	0	2.4	0
58	0	否	是	4.7	ITI		58	0	0	1	4.7	0
57	0	否	否	2.5	ITI		57	0	0	0	2.5	0
57	0	否	否	0.7	ITI		57	0	0	0	0.7	0
56	0	否	否	0.5	ITI		56	0	0	0	0.5	0
56	0	否	否	0.3	ITI		56	0	0	0	0.3	0
56	0	否	否	1.2	ITI		56	0	0	0	1.2	0
56	0	否	否	0.8	NOBEL		56	0	0	0	0.8	1
56	0	否	否	1.4	NOBEL		56	0	0	0	1.4	1
56	0	是	否	1.9	ITI		56	0	1	0	1.9	0
56	0	否	否	1.9	ITI		56	0	0	0	1.9	0
55	0	否	否	2.8	ITI		55	0	0	0	2.8	0
50	0	否	否	2.2	ITI		50	0	0	0	2.2	0
54	0	否	否	2.3	ITI		54	0	0	0	2.3	0
54	0	否	否	2.7	ITI		54	0	0	0	2.7	0
54	0	否	否	2.8	ITI		54	0	0	0	2.8	0
54	0	否	否	2.4	ITI		54	0	0	0	2.4	0
1	1	否	是	4.7	ITI		1	1	0	1	4.7	0
54	0	否	是	4.7	ITI		54	0	0	1	4.7	0
54	0	否	是	3.7	ITI		54	0	0	1	3.7	0
54	0	否	是	4.3	ITI		54	0	0	1	4.3	0
53	0	否	否	1.9	ITI		53	0	0	0	1.9	0
53	0	是	否	1.8	ITI		53	0	1	0	1.8	0
53	0	否	否	4.2	ITI		53	0	0	0	4.2	0
52	0	否	否	2.8	ITI		52	0	0	0	2.8	0
52	0	否	否	0.4	ITI		52	0	0	0	0.4	0
52	0	否	否	1.3	ITI		52	0	0	0	1.3	0
52	0	否	否	3.4	ITI		52	0	0	0	3.4	0
52	0	否	是	0.4	ITI		52	0	0	1	0.4	0
52	0	否	否	1.3	ITI		52	0	0	0	1.3	0
52	0	否	是	2.8	ITI		52	0	0	1	2.8	0
52	0	否	是	3.9	ITI		52	0	0	1	3.9	0
3	1	否	否	0.3	ITI		3	1	0	0	0.3	0
51	0	否	是	4.8	ITI		51	0	0	1	4.8	0
51	0	否	是	3.7	ITI		51	0	0	1	3.7	0
51	0	否	是	3.9	ITI		51	0	0	1	3.9	0
51	0	否	是	3.3	ITI		51	0	0	1	3.3	0
50	0	否	否	2.3	ITI		50	0	0	0	2.3	0
50	0	否	否	2	ITI		50	0	0	0	2	0
49	0	否	否	3.5	ITI		49	0	0	0	3.5	0
49	0	否	否	0.4	ITI		49	0	0	0	0.4	0
48	0	否	否	4.1	NOBEL		48	0	0	0	4.1	1
48	0	否	否	0.9	ITI		48	0	0	0	0.9	0
47	0	否	是	3.6	ITI		47	0	0	1	3.6	0
47	0	是	否	2.8	ITI		47	0	1	0	2.8	0
47	0	否	否	3.8	ITI		47	0	0	0	3.8	0
47	0	否	否	1.7	ITI		47	0	0	0	1.7	0
47	0	否	是	3.9	ITI		47	0	0	1	3.9	0
47	0	是	否	3.4	ITI		47	0	1	0	3.4	0
47	0	否	否	3.7	ITI		47	0	0	0	3.7	0
46	0	否	否	0.8	ITI		46	0	0	0	0.8	0
51	0	否	是	1.9	NOBEL		51	0	0	1	1.9	1
46	0	否	否	2.7	ITI		46	0	0	0	2.7	0
46	0	否	否	1.6	ITI		46	0	0	0	1.6	0
70	0	否	否	2.5	ITI		70	0	0	0	2.5	0
70	0	否	否	2.8	ITI		70	0	0	0	2.8	0
69	0	否	否	2.8	ITI		69	0	0	0	2.8	0
59	0	否	否	3.9	ITI		59	0	0	0	3.9	0
69	0	否	是	2.7	ITI		69	0	0	1	2.7	0
69	0	否	否	2.4	ITI		69	0	0	0	2.4	0
67	0	否	否	1.8	ITI		67	0	0	0	1.8	0
67	0	否	否	2.9	ITI		67	0	0	0	2.9	0
67	0	否	否	2.8	ITI		67	0	0	0	2.8	0
66	0	否	否	0.6	ITI		66	0	0	0	0.6	0
66	0	否	否	2.1	ITI		66	0	0	0	2.1	0
66	0	否	否	2.3	ITI		66	0	0	0	2.3	0
66	0	是	否	2.2	ITI		66	0	1	0	2.2	0
66	0	否	否	1.3	ITI		66	0	0	0	1.3	0
66	0	否	是	2.6	ITI		66	0	0	1	2.6	0
66	0	否	否	3.2	ITI		66	0	0	0	3.2	0
66	0	否	否	3.7	ITI		66	0	0	0	3.7	0
85	0	否	否	2.9	ITI		85	0	0	0	2.9	0
85	0	否	否	3.2	ITI		85	0	0	0	3.2	0
85	0	否	否	2.5	ITI		85	0	0	0	2.5	0
85	0	否	否	1.1	ITI		85	0	0	0	1.1	0
84	0	是	否	1.5	ITI		84	0	1	0	1.5	0
83	0	否	否	3.2	ITI		83	0	0	0	3.2	0
83	0	否	否	2.9	ITI		83	0	0	0	2.9	0
83	0	是	否	2.4	ITI		83	0	1	0	2.4	0
83	0	是	否	2.6	ITI		83	0	1	0	2.6	0
83	0	否	否	1.5	ITI		83	0	0	0	1.5	0
81	0	否	否	2.1	ITI		81	0	0	0	2.1	0
81	0	否	是	1.9	ITI		81	0	0	1	1.9	0
81	0	否	是	1.4	ITI		81	0	0	1	1.4	0
81	0	否	是	2.6	ITI		81	0	0	1	2.6	0
80	0	否	否	1.2	ITI		80	0	0	0	1.2	0
79	0	否	否	3.9	ITI		79	0	0	0	3.9	0
79	0	否	否	1.5	ITI		79	0	0	0	1.5	0
79	0	否	否	1.8	ITI		79	0	0	0	1.8	0
78	0	否	否	3.6	ITI		78	0	0	0	3.6	0
78	0	否	否	2.1	ITI		78	0	0	0	2.1	0
77	0	否	否	2.1	ITI		77	0	0	0	2.1	0
98	0	否	否	1.7	ITI		98	0	0	0	1.7	0
3	1	是	否	3.3	ITI		3	1	1	0	3.3	0
3	1	否	否	4.2	ITI		3	1	0	0	4.2	0
94	0	否	否	2.7	ITI		94	0	0	0	2.7	0
94	0	否	否	3.6	ITI		94	0	0	0	3.6	0
96	0	否	否	2.9	ITI		96	0	0	0	2.9	0
90	0	否	是	2	ITI		90	0	0	1	2	0
90	0	否	否	4.1	ITI		90	0	0	0	4.1	0
90	0	否	否	1.8	ITI		90	0	0	0	1.8	0
90	0	否	否	0.3	ITI		90	0	0	0	0.3	0
90	0	否	否	1.2	ITI		90	0	0	0	1.2	0
89	0	否	否	2.6	ITI		89	0	0	0	2.6	0
89	0	否	否	3.2	ITI		89	0	0	0	3.2	0
89	0	否	是	3.3	ITI		89	0	0	1	3.3	0
88	0	否	否	2.4	ITI		88	0	0	0	2.4	0
88	0	否	否	1.9	ITI		88	0	0	0	1.9	0
88	0	否	否	2.2	ITI		88	0	0	0	2.2	0
88	0	是	否	2.5	ITI		88	0	1	0	2.5	0
87	0	否	否	1.2	ITI		87	0	0	0	1.2	0
106	0	否	是	1.6	ITI		106	0	0	1	1.6	0
106	0	是	是	1.5	ITI		106	0	1	1	1.5	0
106	0	否	否	0.6	ITI		106	0	0	0	0.6	0
106	0	否	否	3.4	ITI		106	0	0	0	3.4	0
101	0	否	否	1.6	ITI		101	0	0	0	1.6	0
101	0	否	是	3.5	ITI		101	0	0	1	3.5	0
101	0	否	否	4.8	ITI		101	0	0	0	4.8	0
115	0	否	否	3.2	ITI		115	0	0	0	3.2	0
101	0	否	否	1.9	ITI		101	0	0	0	1.9	0
101	0	否	否	2.3	ITI		101	0	0	0	2.3	0
118	0	是	否	2.1	ITI		118	0	1	0	2.1	0
15	1	否	否	4.5	ITI		15	1	0	0	4.5	0
110	0	否	否	2.9	ITI		110	0	0	0	2.9	0
116	0	否	否	1.9	ITI		116	0	0	0	1.9	0
116	0	否	否	0.8	ITI		116	0	0	0	0.8	0
116	0	否	否	2.2	ITI		116	0	0	0	2.2	0
116	0	否	否	1	ITI		116	0	0	0	1	0
116	0	否	否	4.2	ITI		116	0	0	0	4.2	0
116	0	否	否	2.7	ITI		116	0	0	0	2.7	0
116	0	否	否	2.8	ITI		116	0	0	0	2.8	0
115	0	否	否	0.3	ITI		115	0	0	0	0.3	0
115	0	否	否	2.2	ITI		115	0	0	0	2.2	0
27	0	是	否	2	ITI		27	0	1	0	2	0
27	0	否	否	1.5	NOBEL		27	0	0	0	1.5	1
27	0	否	否	1.6	ITI		27	0	0	0	1.6	0
27	0	否	否	0.9	ITI		27	0	0	0	0.9	0
27	0	否	否	3.4	ITI		27	0	0	0	3.4	0
26	0	否	否	3.5	NOBEL		26	0	0	0	3.5	1
26	0	否	否	0.3	NOBEL		26	0	0	0	0.3	1
26	0	否	否	4.8	ITI		26	0	0	0	4.8	0
25	0	否	是	4.8	ITI		25	0	0	1	4.8	0
144	0	否	否	0.3	ITI		144	0	0	0	0.3	0
143	0	否	否	2.2	ITI		143	0	0	0	2.2	0
129	0	是	否	3.2	ITI		129	0	1	0	3.2	0
129	0	否	否	2.5	ITI		129	0	0	0	2.5	0
129	0	否	否	1.8	ITI		129	0	0	0	1.8	0
129	0	否	否	2.6	ITI		129	0	0	0	2.6	0
127	0	否	否	1.5	ITI		127	0	0	0	1.5	0
125	0	否	否	1.6	ITI		125	0	0	0	1.6	0
122	0	否	否	1.9	ITI		122	0	0	0	1.9	0
107	0	否	否	3.6	ITI		107	0	0	0	3.6	0
107	0	否	否	4.1	ITI		107	0	0	0	4.1	0
23	0	否	否	1.8	ITI		23	0	0	0	1.8	0
26	0	否	否	3.7	NOBEL		26	0	0	0	3.7	1
26	0	否	否	2.6	NOBEL		26	0	0	0	2.6	1
26	0	否	否	4.9	NOBEL		26	0	0	0	4.9	1
23	0	否	否	3.2	NOBEL		23	0	0	0	3.2	1
22	0	否	否	3.6	ITI		22	0	0	0	3.6	0
24	0	否	否	0.3	ITI		24	0	0	0	0.3	0
22	0	否	否	2	ITI		22	0	0	0	2	0
17	0	否	否	4.6	NOBEL		17	0	0	0	4.6	1
17	0	否	否	4.9	NOBEL		17	0	0	0	4.9	1
21	0	否	是	0.6	ITI		21	0	0	1	0.6	0
21	0	否	是	2.5	ITI		21	0	0	1	2.5	0
21	0	否	否	3.2	ITI		21	0	0	0	3.2	0
21	0	是	否	1.9	ITI		21	0	1	0	1.9	0
21	0	否	否	3.9	ITI		21	0	0	0	3.9	0
19	0	否	否	4.3	ITI		19	0	0	0	4.3	0
19	0	是	否	3.5	ITI		19	0	1	0	3.5	0
19	0	是	否	3.6	ITI		19	0	1	0	3.6	0
19	0	否	否	2.4	ITI		19	0	0	0	2.4	0
18	0	否	否	2.5	ITI		18	0	0	0	2.5	0
18	0	否	否	3.4	ITI		18	0	0	0	3.4	0
18	0	否	否	4.9	ITI		18	0	0	0	4.9	0
18	0	否	否	1.6	NOBEL		18	0	0	0	1.6	1
18	0	否	否	2.5	ITI		18	0	0	0	2.5	0
17	0	是	否	2.6	ITI		17	0	1	0	2.6	0
17	0	否	否	2.6	ITI		17	0	0	0	2.6	0
17	0	否	否	1.6	ITI		17	0	0	0	1.6	0
17	0	否	否	3.5	ITI		17	0	0	0	3.5	0
16	0	否	否	0.9	NOBEL		16	0	0	0	0.9	1
16	0	否	否	4.8	NOBEL		16	0	0	0	4.8	1
16	0	否	否	4.9	NOBEL		16	0	0	0	4.9	1
15	0	否	否	1.1	ITI		15	0	0	0	1.1	0
15	0	否	否	4.6	NOBEL		15	0	0	0	4.6	1
15	0	否	否	3.5	ITI		15	0	0	0	3.5	0
15	0	否	否	3.6	ITI		15	0	0	0	3.6	0
12	0	否	否	1.2	NOBEL		12	0	0	0	1.2	1
2	1	否	否	3.1	NOBEL		2	1	0	0	3.1	1
15	0	否	否	2.9	NOBEL		15	0	0	0	2.9	1
15	0	否	否	2.7	NOBEL		15	0	0	0	2.7	1
15	0	否	否	4.7	NOBEL		15	0	0	0	4.7	1
15	0	否	否	2.1	ITI		15	0	0	0	2.1	0
15	0	否	否	3.5	NOBEL		15	0	0	0	3.5	1
15	0	否	是	2.3	NOBEL		15	0	0	1	2.3	1
15	0	否	否	4.3	NOBEL		15	0	0	0	4.3	1
15	0	否	是	1.3	NOBEL		15	0	0	1	1.3	1
14	0	是	否	2.7	NOBEL		14	0	1	0	2.7	1
14	0	否	否	0.5	NOBEL		14	0	0	0	0.5	1
14	0	是	否	4.9	NOBEL		14	0	1	0	4.9	1
14	0	否	是	4.9	ITI		14	0	0	1	4.9	0
14	0	否	否	3.5	NOBEL		14	0	0	0	3.5	1
14	0	是	否	2.3	ITI		14	0	1	0	2.3	0
13	0	否	否	0.4	NOBEL		13	0	0	0	0.4	1
13	0	否	否	3.9	ITI		13	0	0	0	3.9	0
1	1	否	否	4.8	NOBEL		1	1	0	0	4.8	1
13	0	否	否	2.6	ITI		13	0	0	0	2.6	0
13	0	否	否	4.6	ITI		13	0	0	0	4.6	0
13	0	否	否	0.5	ITI		13	0	0	0	0.5	0
13	0	否	否	2.2	ITI		13	0	0	0	2.2	0
12	0	否	否	2.5	ITI		12	0	0	0	2.5	0
12	0	是	是	3.9	ITI		12	0	1	1	3.9	0
12	0	否	否	4.6	ITI		12	0	0	0	4.6	0
12	0	否	否	1.2	ITI		12	0	0	0	1.2	0
12	0	否	否	1.2	NOBEL		12	0	0	0	1.2	1
11	0	否	否	4.3	ITI		11	0	0	0	4.3	0
11	0	否	否	3.5	ITI		11	0	0	0	3.5	0
11	0	否	否	2.8	ITI		11	0	0	0	2.8	0
11	0	否	是	1.3	NOBEL		11	0	0	1	1.3	1
11	0	否	否	2.3	NOBEL		11	0	0	0	2.3	1
11	0	否	否	2.6	NOBEL		11	0	0	0	2.6	1
11	0	是	否	4.6	NOBEL		11	0	1	0	4.6	1
11	0	否	否	4.6	NOBEL		11	0	0	0	4.6	1
11	0	否	否	4.9	NOBEL		11	0	0	0	4.9	1
11	0	否	是	4.8	NOBEL		11	0	0	1	4.8	1
10	0	否	否	3.3	NOBEL		10	0	0	0	3.3	1
10	0	否	否	3.6	NOBEL		10	0	0	0	3.6	1
10	0	否	否	1.7	NOBEL		10	0	0	0	1.7	1
10	0	否	否	3.2	NOBEL		10	0	0	0	3.2	1
10	0	否	否	2.9	NOBEL		10	0	0	0	2.9	1
10	0	否	否	2.4	NOBEL		10	0	0	0	2.4	1

## Sheet: Sheet2
bone grafting		perforation		smoking		type		number		IPL		diameter
5.575	1	0.975	1	0.975	1	1.5	1	1.5	1	0.925	1	1.5	1
1.975	1	2.175	1	1	1	1.95	1	1.95	1	0.925	1	1.95	1
1.375	1	0.65	1	1.3	1	0.925	1	0.7	1	0.975	1	1.3	1
4.2	1	0.825	1	1.325	1	0.925	1	2.175	1	1	1	0.825	1
2.225	1	1.975	1	0.65	1	0.975	1	0.65	1	2.175	1	5.575	1
2.35	1	0.95	1	1.575	1	1	1	0.85	1	1.05	1	1.325	1
1.475	1	2.725	1	1.55	1	1.3	1	1.05	1	0.85	1	1.325	1
2.5	1	0.925	1	2.925	1	1.325	1	0.925	1	0.95	1	2.725	1
2.6	1	1.1	1	3.225	1	2.175	1	0.85	1	3.525	1	0.975	1
3.55	1	1.075	1	3	1	0.65	1	0.95	1	0.825	1	1.075	1
1.2	1	0.575	1	1.375	1	1.05	1	1.575	1	1.075	1	2.4	1
4.225	1	0.7	1	2.225	1	0.925	1	3.525	1	3.725	1	0.725	1
1.5	2	3.55	1	2.35	1	0.85	1	0.825	1	3.55	1	0.85	1
1.95	2	0.6	1	0.95	1	0.95	1	1.075	1	5.575	1	1.075	1
0.925	2	1.5	2	1.1	1	1.575	1	5.575	1	1.225	1	0.875	1
0.925	2	1.95	2	2.5	1	3.525	1	1.925	1	1.425	1	1.475	1
0.7	2	0.925	2	0.575	1	0.825	1	1.55	1	1.975	1	1.1	1
0.975	2	0.925	2	1.5	2	1.075	1	0.875	1	1.375	1	3.55	1
1	2	0.7	2	1.95	2	3.725	1	2.575	1	2.075	1	1.2	1
1.3	2	1	2	0.925	2	3.55	1	1.975	1	1.325	1	0.95	1
1.325	2	1.3	2	0.925	2	5.575	1	1.45	1	4.2	1	1.075	1
2.175	2	1.325	2	0.7	2	1.225	1	1.375	1	0.95	1	0.925	2
0.65	2	0.85	2	2.175	2	1.425	1	1.375	1	3.225	1	0.925	2
0.85	2	1.05	2	0.85	2	1.925	1	2.075	1	3	1	0.7	2
1.05	2	0.925	2	1.05	2	1.55	1	4.2	1	2.725	1	0.975	2
0.925	2	0.85	2	0.925	2	0.875	1	0.95	1	2.825	1	1	2
0.85	2	0.95	2	0.85	2	2.575	1	1.05	1	2.875	1	1.325	2
0.95	2	1.575	2	0.95	2	1.975	1	2.7	1	1.375	1	2.175	2
1.575	2	3.525	2	3.525	2	1.45	1	2.925	1	2.225	1	0.65	2
3.525	2	1.075	2	0.825	2	1.375	1	2.725	1	2.35	1	0.85	2
0.825	2	3.725	2	1.075	2	1.375	1	1.375	1	2.375	1	1.05	2
1.075	2	3.55	2	3.725	2	2.075	1	0.925	1	0.875	1	0.925	2
3.725	2	5.575	2	3.55	2	1.325	1	0.975	1	1.075	1	0.85	2
3.55	2	1.225	2	5.575	2	1.325	1	0.95	1	1	1	0.95	2
1.225	2	1.425	2	1.225	2	4.2	1	2.375	1	2.4	1	1.575	2
1.425	2	1.925	2	1.425	2	0.95	1	0.875	1	1.05	1	3.525	2
1.925	2	1.55	2	1.925	2	1.05	1	0.95	1	1.25	1	1.075	2
1.55	2	0.875	2	0.875	2	2.7	1	2.4	1	1.1	1	3.725	2
0.875	2	2.575	2	2.575	2	2.925	1	1.05	1	0.975	1	3.55	2
2.575	2	1.45	2	1.975	2	3.225	1	1.65	1	0.925	1	1.225	2
1.45	2	1.375	2	1.45	2	3	1	0.975	1	0.925	1	1.425	2
1.375	2	1.375	2	1.375	2	2.725	1	1.1	1	1.025	1	1.925	2
2.075	2	2.075	2	1.375	2	2.825	1	0.925	1	0.675	1	1.55	2
1.325	2	1.325	2	2.075	2	2.875	1	0.925	1	0.925	1	0.875	2
1.325	2	1.325	2	1.325	2	2.225	1	1.025	1	1.2	1	2.575	2
0.95	2	4.2	2	1.325	2	2.35	1	0.675	1	1.1	1	1.975	2
1.05	2	1.05	2	4.2	2	0.925	1	0.725	1	3.1	1	1.45	2
2.7	2	2.7	2	0.95	2	0.95	1	0.85	1	2.475	1	1.375	2
2.925	2	2.925	2	1.05	2	0.875	1	1.075	1	0.575	1	1.375	2
3.225	2	3.225	2	2.7	2	0.95	1	1.075	1	2.6	1	2.075	2
3	2	3	2	2.725	2	1.05	1	1.2	1	1	1	4.2	2
2.725	2	2.825	2	2.825	2	1.65	1	0.95	1	0.625	1	0.95	2
2.825	2	2.875	2	2.875	2	0.975	1	1.1	1	0.525	1	1.05	2
2.875	2	1.375	2	0.925	2	1.1	1	2.075	1	3.55	1	2.7	2
1.375	2	2.225	2	0.975	2	0.925	1	2.5	1	2.525	1	2.925	2
0.925	2	2.35	2	0.95	2	0.925	1	0.575	1	0.6	1	3.225	2
0.975	2	0.975	2	2.375	2	1.025	1	2.6	1	1.075	1	3	2
0.95	2	0.95	2	0.875	2	0.675	1	1	1	0.85	1	2.825	2
2.375	2	2.375	2	0.95	2	0.85	1	0.7	1	4.225	1	2.875	2
0.875	2	0.875	2	1.075	2	1.075	1	0.625	1	1.15	1	1.375	2
0.95	2	0.95	2	1.2	2	1.075	1	0.525	1	1.125	1	2.225	2
1.075	2	1.075	2	1	2	0.95	1	1.2	1	1.025	1	2.35	2
1.2	2	1.2	2	2.4	2	2.6	1	3.55	1	1.5	2	0.925	2
1	2	1	2	1.05	2	0.7	1	2.525	1	1.95	2	0.95	2
2.4	2	2.4	2	1.65	2	0.625	1	2.025	1	0.7	2	2.375	2
1.05	2	1.05	2	1.25	2	1.1	1	1.2	1	1.3	2	0.875	2
1.65	2	1.65	2	1.1	2	1.175	1	0.95	1	1.325	2	0.95	2
1.25	2	1.25	2	0.975	2	1.2	1	0.6	1	0.65	2	1.2	2
1.1	2	1.1	2	1.1	2	3.55	1	4.225	1	0.85	2	1	2
0.975	2	0.975	2	0.925	2	2.525	1	1.025	1	0.925	2	1.05	2
1.1	2	0.925	2	0.925	2	0.7	2	1.025	1	1.575	2	1.65	2
0.925	2	0.925	2	1.025	2	0.85	2	1.025	1	1.925	2	1.25	2
0.925	2	1.025	2	0.675	2	1.375	2	0.925	2	1.55	2	1.1	2
1.025	2	0.675	2	0.725	2	0.975	2	0.925	2	0.875	2	0.975	2
0.675	2	0.725	2	0.85	2	2.375	2	0.975	2	2.575	2	1.1	2
0.725	2	0.85	2	1.075	2	1.075	2	1	2	1.45	2	0.925	2
0.85	2	1.075	2	1.075	2	1.2	2	1.3	2	1.375	2	0.925	2
1.075	2	0.875	2	0.875	2	1	2	1.325	2	1.325	2	1.025	2
1.075	2	0.925	2	0.925	2	2.4	2	3.725	2	1.05	2	0.675	2
0.875	2	1.2	2	1.2	2	1.25	2	3.55	2	2.7	2	1.075	2
0.925	2	0.95	2	2.075	2	1.1	2	1.225	2	2.925	2	0.925	2
1.2	2	1.1	2	3.1	2	0.725	2	1.425	2	0.925	2	1.2	2
0.95	2	2.075	2	3.1	2	0.875	2	1.325	2	0.975	2	0.95	2
1.1	2	3.1	2	1.475	2	0.925	2	1.325	2	0.95	2	1.1	2
2.075	2	3.1	2	2.475	2	1.2	2	3.225	2	0.95	2	2.075	2
3.1	2	1.475	2	2.6	2	1.1	2	3	2	1.2	2	3.1	2
3.1	2	2.475	2	1	2	2.075	2	2.825	2	1.65	2	3.1	2
2.475	2	2.5	2	0.7	2	3.1	2	2.875	2	1.1	2	2.475	2
0.575	2	2.6	2	0.625	2	3.1	2	2.225	2	0.725	2	2.5	2
1	2	1	2	0.525	2	1.475	2	2.35	2	0.85	2	0.575	2
0.7	2	0.625	2	1.1	2	2.475	2	1.075	2	1.075	2	2.6	2
0.625	2	0.525	2	1.175	2	2.5	2	1.2	2	1.075	2	1	2
0.525	2	1.1	2	1.2	2	0.575	2	1	2	0.875	2	0.7	2
1.1	2	1.175	2	3.55	2	1	2	1.25	2	0.95	2	0.625	2
1.175	2	1.2	2	2.525	2	0.525	2	1.1	2	2.075	2	0.525	2
1.2	2	2.525	2	2.025	2	2.025	2	0.875	2	3.1	2	1.175	2
2.525	2	2.025	2	1.2	2	1.2	2	0.925	2	1.475	2	1.2	2
2.025	2	1.2	2	0.95	2	0.95	2	3.1	2	2.5	2	2.525	2
0.95	2	0.95	2	0.6	2	0.6	2	3.1	2	0.7	2	2.025	2
0.6	2	1.075	2	1.075	2	1.075	2	1.475	2	1.1	2	0.6	2
1.075	2	0.85	2	0.85	2	0.85	2	2.475	2	1.175	2	0.85	2
0.85	2	4.225	2	4.225	2	4.225	2	1.1	2	1.2	2	4.225	2
1.15	2	1.15	2	1.15	2	1.15	2	1.175	2	2.025	2	1.15	2
1.125	2	1.125	2	1.125	2	1.125	2	1.075	2	1.2	2	1.125	2
1.025	2	1.025	2	1.025	2	1.025	2	0.85	2	0.95	2	1.025	2
1.025	2	1.025	2	1.025	2	1.025	2	1.15	2	1.025	2	1.025	2
1.025	2	1.025	2	1.025	2	1.025	2	1.125	2	1.025	2	1.025	2
